# Supplementary material for: Synthesis of aryl azide chain-end functionalized N-linked glycan polymers and their photo-labelling of specific protein
Source: Royal Society of Chemistry journal article supplement (doi:10.1039/d0ra08400j), 2020-01-01
Supplement: d0ra08400j1.pdf [file d0ra08400j1.pdf]

## Supporting Information

### Synthesis of Aryl Azide Chain-end Functionalized *N*-Linked Glycan Polymer and Its Photo-labelling of Specific Protein

Ka Keung Chan<sup>a</sup>, Qiaoshi Lei<sup>b</sup>, Jinshan Tang<sup>b</sup>, Xue-Long Sun<sup>a\*</sup>

<sup>a</sup>Department of Chemistry, Chemical and Biomedical Engineering and Center for Gene Regulation in Health and Dis-ease (GRHD), Cleveland State University, 2121 Euclid Avenue, Cleveland, Ohio 44115, United States

<sup>b</sup>Institute of Traditional Chinese Medicine & Natural Products, College of Pharmacy, Jinan University, West 601, Huangpu Avenue, Guangzhou, People's Republic of China

### Experimental

#### Materials and methods

All solvents and reagents were purchased from commercial sources and were used as received. Glc, Gal, and Lac were purchased from Sigma (USA). Deionized water with a resistivity of 18 MΩ cm<sup>-1</sup> was used as solvent in all polymerization reactions and dialysis experiments. Dialysis was performed using cellulose membrane with a molecular weight cutoff of 3 kDa with water as solvent. <sup>1</sup>H NMR spectra were measured at room temperature with a Bruker AV400 MHz spectrometer and D<sub>2</sub>O was used as deuterated solvent. Aryl chloride chain-end functionalized *N*-lactosyl polymer synthesized in our previous report<sup>1</sup>.

**Glycomonomers (3a-3c) were synthesized in our previously reported methods<sup>1</sup>.**

**Synthesis of glycosylamines (2a-2c) via Kochetkov method.** A solution of saccharide(1a-1c) (5.0 mmol) and ammonium bicarbonate (389.0 mg, 5.0 mmol) in 20 mL of aqueous ammonia was kept in an oil bath at 40°C for 40 h and then was freeze-dried to afford glycosylamines (2a-2c), which were directly subjected to the next reaction without purification.

**Acrylation of glycosylamines (2a-2c).** The dry glycosylamines (2a-2c) obtained above were dissolved in 60 mL of CH<sub>3</sub>OH-H<sub>2</sub>O (1:1, v/v) and 3.0 g of Na<sub>2</sub>CO<sub>3</sub> was added, respectively. The mixture was cooled in an ice bath for 30 min and then a solution of 1.28 mL of acryloyl chloride in 7 mL of THF was added dropwise. After that, the reaction mixture was stirred at 0°C for another 1 h. The organic solvents were evaporated under reduced pressure and the remaining aqueous layer was lyophilized to dryness, which were purified by silica gel column chromatography eluted with EtOAc and CH<sub>3</sub>OH (5:3, v/v) afford glycomonomers (3a-3c).

#### Preparation of aryl azide chain-end functionalized *N*-linked glycan polymers (4a-4c)

**Aryl azide chain-end functionalized *N*-glucosyl polymer (4a):** 4-Azidoaniline (3.1 mg, 0.018 mmol) and 6.4 μL of HBF<sub>4</sub> solution (48 wt%, 0.054 mmol) were dissolved in 200 μL of degassed ddH<sub>2</sub>O in a three-necked flask. The mixture solution was cooled in an ice bath for 30 min and a solution of sodium nitrite (NaNO<sub>2</sub>, 2.8 mg, 0.034 mmol) in 200 μL of ddH<sub>2</sub>O was added to react for 30 min in an atmosphere of N<sub>2</sub>. Then, a degassed mixture solution of *N*-(prop-2-enoyl)-β-D-glucopyranosylamine (42.0 mg, 0.18 mmol), acrylamide (51.2 mg, 0.72 mmol) and NaOCN (1.2 mg, 0.018 mmol) dissolved in 1 mL of degassed ddH<sub>2</sub>O was added into the flask containing

the diazonium salt. The reaction solution was kept in an oil bath at 60°C to react for 20 h. The resulting mixture was dialyzed against ddH<sub>2</sub>O for 2 days to remove the impurity and then freeze-dried to yield the glycopolymer **4a** (72.0 mg, 58.0%). The molecular weight (*M<sub>n</sub>*) was about 33,300 with saccharide content at about 9,000 as determined by <sup>1</sup>H NMR spectrum.

**Aryl azide chain-end functionalized N-galactosyl polymer (4b):** 4-Azidoaniline (3.1 mg, 0.018 mmol) and 6.4 μL of HBF<sub>4</sub> solution (48 wt%, 0.054 mmol) were dissolved in 200 μL of degassed ddH<sub>2</sub>O in a three-necked flask. The mixture solution was cooled in an ice bath for 30 min and a solution of sodium nitrite (NaNO<sub>2</sub>, 2.8 mg, 0.034 mmol) in 200 μL of ddH<sub>2</sub>O was added to react for 30 min in an atmosphere of N<sub>2</sub>. Then a degassed mixture solution of *N*-(prop-2-enoyl)-β-D-galactopyranosylamine (42.0 mg, 0.18 mmol), acrylamide (51.2 mg, 0.72 mmol) and NaOCN (1.2 mg, 0.018 mmol) dissolved in 1 mL of degassed ddH<sub>2</sub>O was added into the flask containing the diazonium salt. The reaction solution was kept in an oil bath at 60°C to react for 20 h. The resulting mixture was dialyzed against ddH<sub>2</sub>O for 2 days to remove the impurity and then freeze-dried to yield the glycopolymer **4b** (82.0 mg, 78.0%). The molecular weight (*M<sub>n</sub>*) was about 21,800 with saccharide content at about 9,000 as determined by <sup>1</sup>H NMR spectrum.

**Aryl azide chain-end functionalized N-lactosyl polymer (4c).** 4-Azidoaniline (12 mg, 0.07 mmol) and sodium nitrite (NaNO<sub>2</sub>, 10 mg 0.14 mmol) were dissolved in 2.5 mL of H<sub>2</sub>O-THF (1:1) in a three-necked flask. The mixture solution was cooled in an ice bath for 30 min and the 36 μL of HBF<sub>4</sub> solution (48 wt%, 0.276 mmol) was added to react for 1 h. Then, a degassed mixture of *N*-(prop-2-enoyl)-β-D-lactopyranosylamine (420 mg, 1.06 mmol) acrylamide (280 mg, 3.94 mmol) and NaOCN (10 mg, 0.153 mmol) dissolved in 2 mL of ddH<sub>2</sub>O was added into the flask containing the diazonium salt. The reaction solution was kept in an oil bath at 60°C to react for 20 h. The resulting mixture was dialyzed against ddH<sub>2</sub>O for 2 days to remove the impurity and then freeze-dried to yield the glycopolymer **4c** (436 mg, 62.3%). The molecular weight (*M<sub>n</sub>*) was about 78,970 with saccharide content at about 19,500 as determined by <sup>1</sup>H NMR spectrum.

**Preparation of aryl azide chain-end functionalized polyacrylamide.** 4-Azidoaniline (7.2 mg, 0.042 mmol) and sodium nitrite (NaNO<sub>2</sub>, 6 mg 0.084 mmol) were dissolved in 1.5 mL of H<sub>2</sub>O-THF (1:1) in a three-necked flask. The mixture solution was cooled in an ice bath for 30 min and the 21.6 μL of HBF<sub>4</sub> solution (48 wt%, 0.166 mmol) was added to react for 1 h. Then a degassed solution of acrylamide (420 mg, 5.91 mmol) and NaOCN (6 mg, 0.0918 mmol) dissolved in 1.2 mL of ddH<sub>2</sub>O was added into the flask containing the diazonium salt. The reaction solution was kept in an oil bath at 60°C to react for 20 h. The resulting mixture was dialyzed against ddH<sub>2</sub>O for 2 days to remove the impurity and then freeze-dried to yield the aryl azide chain-end functionalized polyacrylamide (350 mg, 83.4%). The molecular weight (*M<sub>n</sub>*) was about 44744 as determined by <sup>1</sup>H NMR spectrum.

#### UV-induced photo-crosslinking assay

Glycopolymers (2.8 mg, 3.57x10<sup>-8</sup> mol) and lectin *Arachis hypogae* (0.6 mg, 5.45x10<sup>-9</sup> mol, lyophilized powder, Sigma) were dissolved in 100 μL of PBS buffer (pH 7.4) solution containing 0.2% Tween 20 and allowed to react for 4 h in RT. Then, the mixture was degassed and exposed to a 366 nm UV source in the dark for 30 min while remaining on ice.

#### Characterization of photo-labeled lectin by SDS-PAGE

Laemmli Sample Buffer (Bio-Rad, #1610737) was prepared according to product guidelines. Sample taken directly from photo-crosslinking assay was added to Laemmli Sample Buffer to

produce aliquots corresponding to 25  $\mu\text{g}$  of protein (5  $\mu\text{L}$ ) for each sample and then boiled at 100°C for 20 min. Samples were then characterized in SDS-polyacrylamide gels containing 10% diH<sub>2</sub>O, 12% acrylamide/Bis-acrylamide, 25% 1.5 M Tris-HCL pH 8.8, 0.1% SDS, 0.1% APS, 0.1% TEMED, and electrophoresis were performed at 120V for 90 min followed by silver staining (Pierce® Silver Stain Kit, Thermo Scientific).

### <sup>1</sup>H NMR spectra

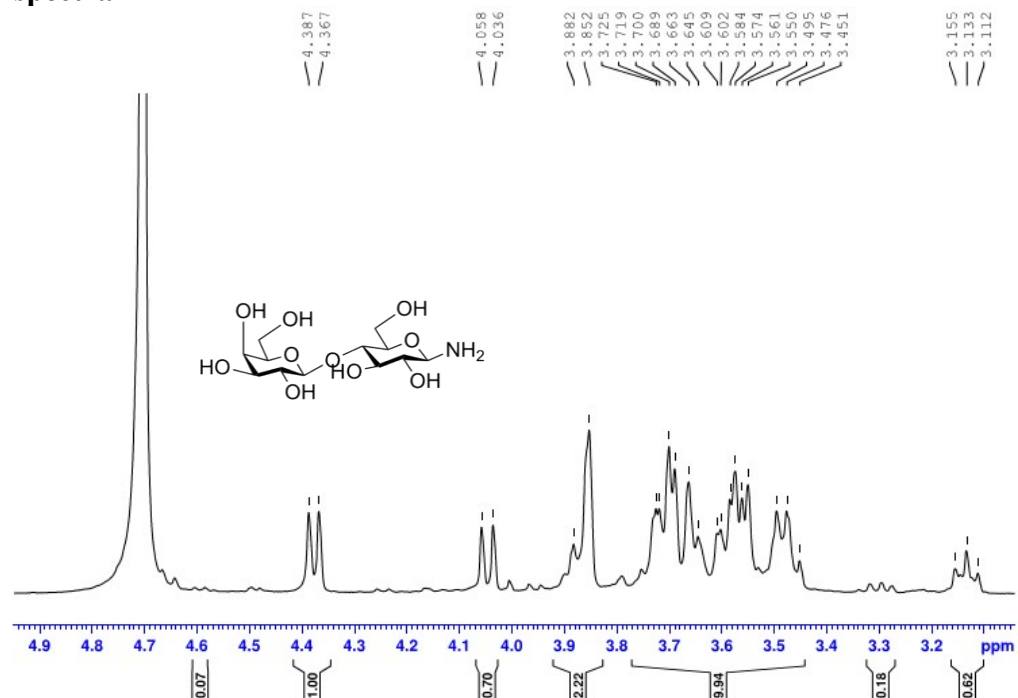

**Fig. S1.** <sup>1</sup>H NMR spectrum of  $\beta$ -D-lactopyranosylamine (2c) in D<sub>2</sub>O.

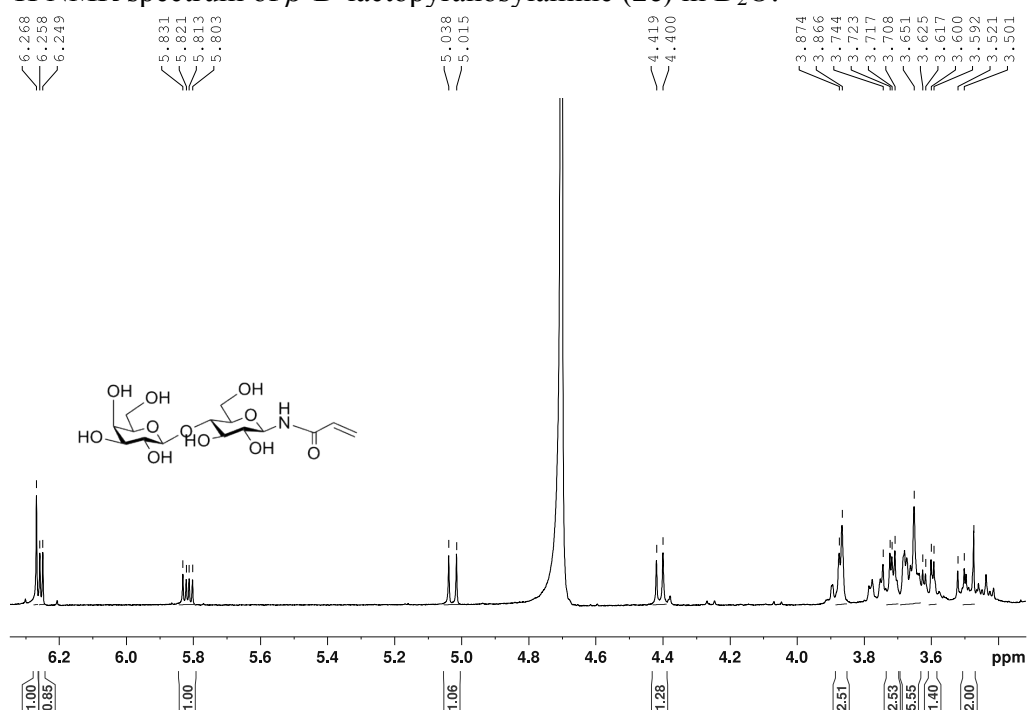

**Fig. S2.**  $^1\text{H}$  NMR spectrum of *N*-(Prop-2-enoyl)- $\beta$ -D-lactopyranosylamine (**3c**) in  $\text{D}_2\text{O}$ .

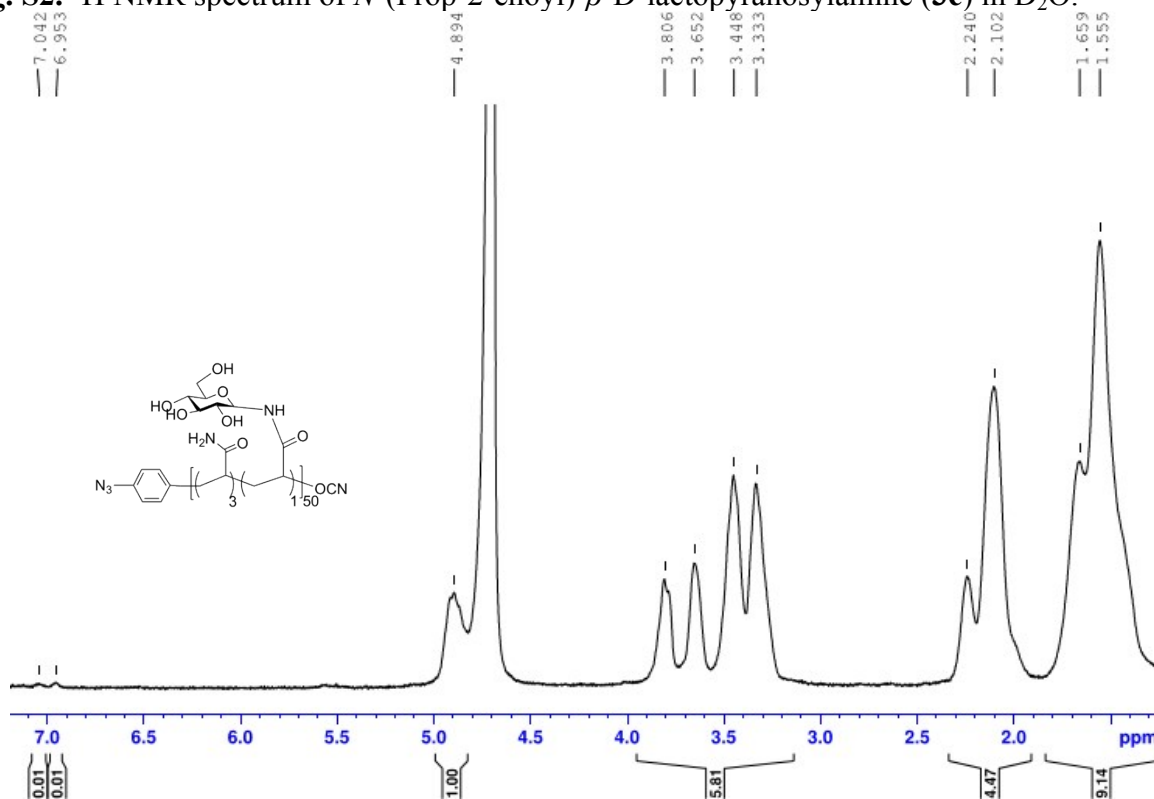

**Fig. S3.**  $^1\text{H}$  NMR spectrum of glucosyl glycopolymer (**4a**) in  $\text{D}_2\text{O}$ .

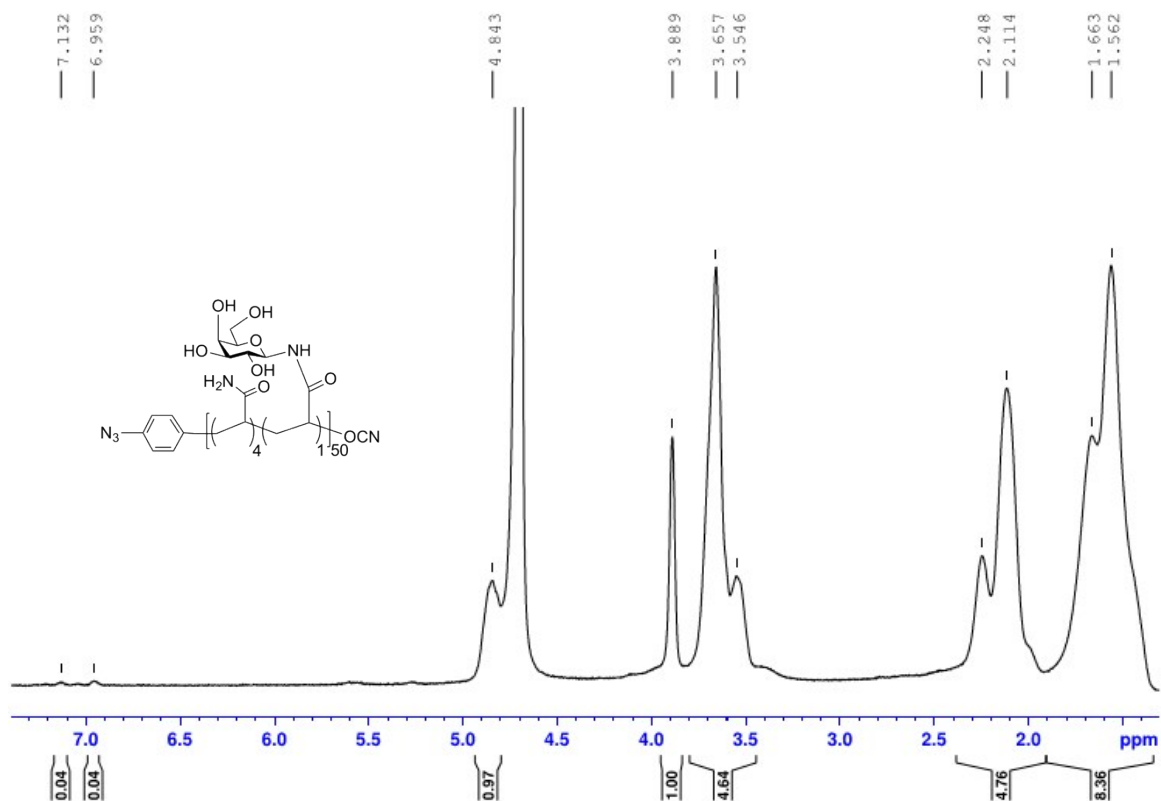

**Fig. S4.**  $^1\text{H}$  NMR spectrum of galactosyl glycopolymer (**4b**) in  $\text{D}_2\text{O}$ .

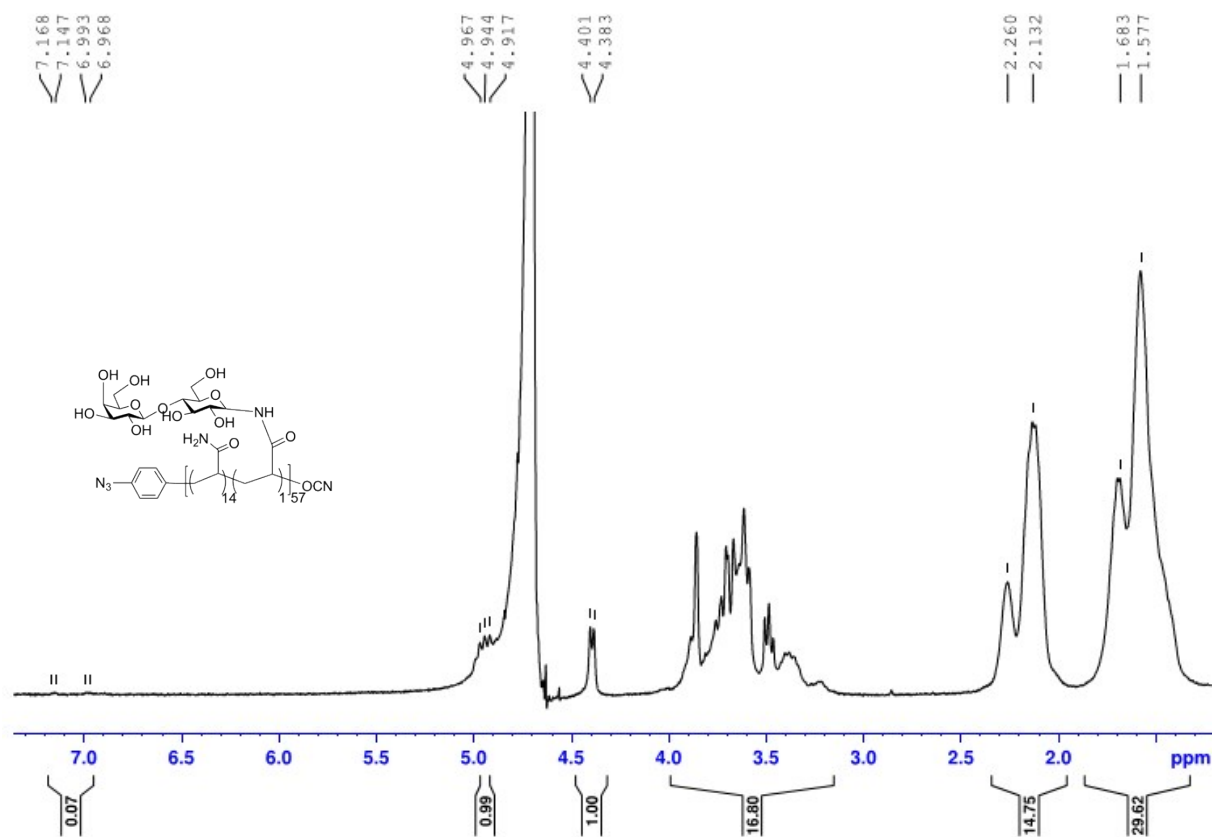

**Fig. S5.**  $^1\text{H}$  NMR spectrum of lactosyl glycopolymer (**4c**) in  $\text{D}_2\text{O}$ .

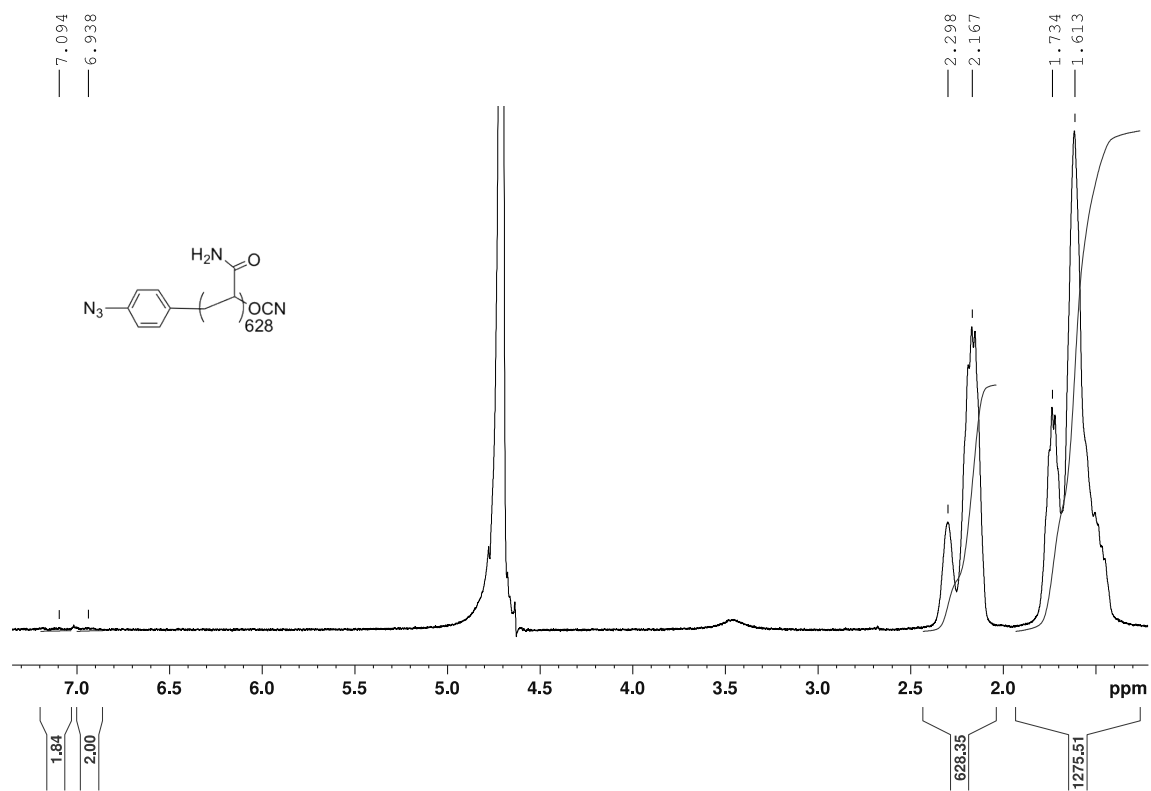

**Fig. S6.**  $^1\text{H}$  NMR spectrum of polyacrylamide in  $\text{D}_2\text{O}$ .

## Reference

1. Tang, J.; Ozhegov, E.; Liu, Y.; Wang, D.; Yao, X.; Sun, X. L. Straightforward Synthesis of N-Glycan Polymers from Free Glycans via Cyanoxyl Free Radical-Mediated Polymerization. *ACS Macro Lett.* **2017**, *6* (2), 107-111. <https://doi.org/10.1021/acsmacrolett.6b00928>.
